# Supplementary material for: Quantitative Effects of Temperature and Exposure Duration on the Occurrence and Repair of Indirect Chilling Injury in the Fall Armyworm Spodoptera frugiperda
Source: MDPI journal article supplement (doi:10.3390/insects14040356), 2023-04-03
Supplement: s1 [file s1]

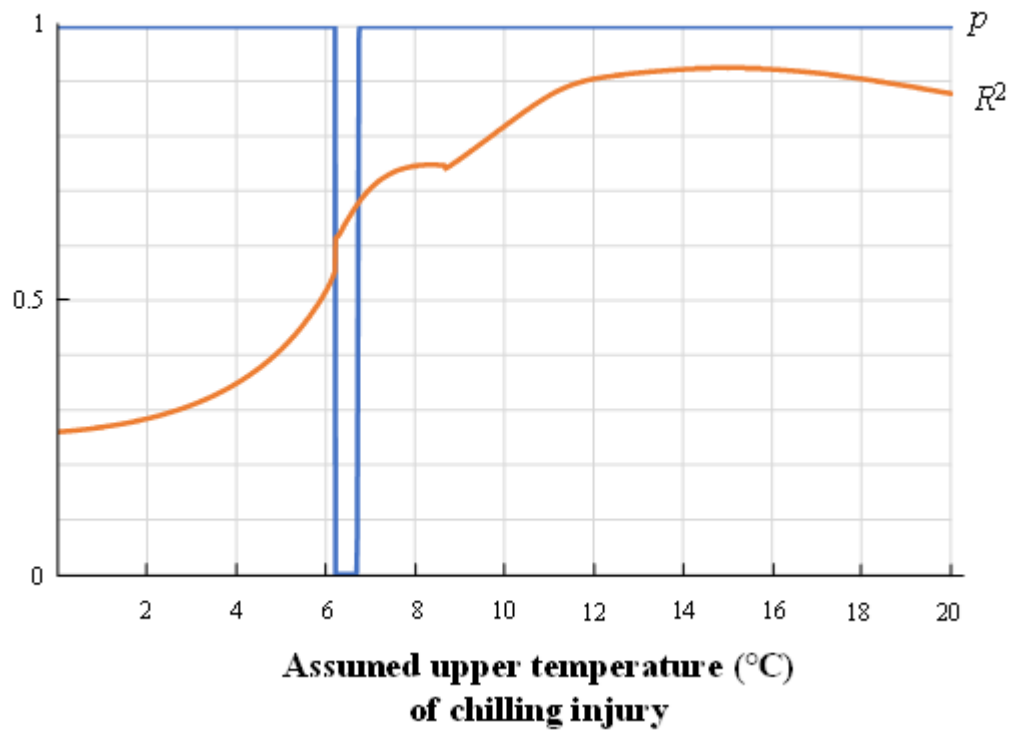

**Supplemental Figure S1.** Changes in  $R^2$  and  $P$  values of a fitted time–temperature model with changes in the assumed upper-limit temperature for chilling injury  $c$  (Nedvěd et al. 1998; see main text for equation). The best values for parameters  $a$  and  $b$  were estimated by the least square method for each value of  $c$  at intervals of 0.01 °C.
